# Supplementary material
Source: ML conference proceedings conference paper supplement (https://openaccess.thecvf.com/content/ICCV2025/html/Zou_Bi-Level_Optimization_for_ICCV_2025_paper.html)
Supplement: Supplementary file 1 [file Zou_Bi-Level_Optimization_for_ICCV_2025_supplemental.pdf]

# Bi-Level Optimization for Self-Supervised AI-Generated Face Detection

## Supplementary Material

### A. Computation of Bi-level Optimization

In solving the bi-level optimization Problem (1), parameters  $\theta$  and  $\lambda$  are updated alternately:

$$\theta' = \theta - \alpha \nabla_{\theta} \sum_{x \in \mathcal{B}_{tr}} \sum_{i=1}^K \lambda_i \ell_i(x; \theta) \quad (14a)$$

$$\lambda \leftarrow \lambda - \beta \nabla_{\lambda} \sum_{x \in \mathcal{B}_{val}} \ell_1(x; \theta'(\lambda)) \quad (14b)$$

$$\theta \leftarrow \theta - \alpha \nabla_{\theta} \sum_{x \in \mathcal{B}_{tr}} \sum_{i=1}^K \lambda_i \ell_i(x; \theta), \quad (14c)$$

where  $\alpha$  and  $\beta$  are the inner- and outer-loop learning rates, respectively. To compute  $\nabla_{\lambda} \ell_1(x; \theta'(\lambda))$ , we apply the chain rule, yielding

$$\nabla_{\lambda} \ell_1(x; \theta'(\lambda)) = \nabla_{\lambda} \theta'(\lambda) \nabla_{\theta'} \ell_1(x; \theta'(\lambda)). \quad (15)$$

Making use of Eq. (14a) and defining  $\ell_{pre}(\theta, \lambda) = \sum_{x \in \mathcal{B}_{tr}} \sum_{i=1}^K \lambda_i \ell_i(x; \theta)$ , we have the Jacobian:

$$\begin{aligned} \nabla_{\lambda} \theta'(\lambda) &= \nabla_{\lambda} (\theta - \alpha \nabla_{\theta} \ell_{pre}(\theta, \lambda)) \\ &= -\alpha \nabla_{\theta, \lambda}^2 \ell_{pre}(\theta, \lambda)^{\top}. \end{aligned} \quad (16)$$

Substituting it into Eq. (15), we obtain the final expression:

$$\nabla_{\lambda} \ell_1(x; \theta'(\lambda)) = -\alpha \nabla_{\theta, \lambda}^2 \ell_{pre}(\theta, \lambda)^{\top} \nabla_{\theta'} \ell_1(x; \theta'(\lambda)). \quad (17)$$

**Finite Difference Approximation.** Direct computation of the mixed second-order derivative  $\nabla_{\theta, \lambda}^2 \ell_{pre}(\theta, \lambda)$  is computationally intensive. To circumvent this, we employ a finite difference scheme [A1, A2] to approximate the Jacobian-vector product required in the outer-loop gradient. Let  $v = \nabla_{\theta'} \ell_1(x; \theta'(\lambda))$  denotes the gradient of the outer-loop loss with respect to the updated parameters. Define the gradient of the inner-loop objective with respect to  $\lambda$  as a function of  $\theta$ , i.e.,  $F(\theta) = \nabla_{\lambda} \ell_{pre}(\theta, \lambda)$ . We apply a second-order central difference approximation of the directional derivative of  $F$  along  $v$ :

$$\begin{aligned} &\nabla_{\theta, \lambda}^2 \ell_{pre}(\theta, \lambda)^{\top} \nabla_{\theta'} \ell_1(x; \theta'(\lambda)) \\ &= \nabla_{\theta} F(\theta)^{\top} v \\ &\approx \frac{F(\theta + \epsilon v) - F(\theta - \epsilon v)}{2\epsilon} \\ &= \frac{\nabla_{\lambda} \ell_{pre}(\theta^+, \lambda) - \nabla_{\lambda} \ell_{pre}(\theta^-, \lambda)}{2\epsilon}, \end{aligned} \quad (18)$$

where

$$\theta^{\pm} = \theta \pm \epsilon v, \quad (19)$$

and  $\epsilon$  is a small constant.

### B. EXIF Tag Selection

This section details the procedure for selecting EXIF tags used in our self-supervised pretraining.

We begin by identifying all EXIF tags that appear in more than 50% of the collected photographic face images from the FDF dataset [62]. Table 8 lists their frequencies and representative values. To ensure that the selected tags offer meaningful supervisory signals, we apply three empirical filtering criteria:

- **Relevance to Digital Imaging:** The chosen tag must encode semantically or physically interpretable imaging attributes (e.g., exposure settings and camera make).
- **Information Richness:** Tags dominated by unknown entries or a single category are excluded to avoid degenerate supervision.
- **Semantic Redundancy Removal:** Tags whose semantics largely overlap with others (e.g., F-number with aperture) are removed for parsimony.

For example, tags such as date/time, EXIF version, resolution unit, and scene capture type are excluded due to irrelevance to image formation. Likewise, flash is excluded because approximately  $\sim 75\%$  of its values are missing or unknown.

After refinement, we retain nine EXIF tags for pretraining: aperture, exposure mode, exposure program, exposure time, focal length, ISO speed, makes, metering mode, and white balance mode.

### C. Competing Detectors

This section briefly summarizes all competing detectors used for comparison.

**CNN** [52] trains a ResNet-50 classifier with standard data augmentations such as JPEG compression, Gaussian blurring as a way of improving generalizability.

**GramNet** [34] identifies AI-generated faces by capturing global texture statistics.

**RECCE** [3] learns to reconstruct face photographs. It is originally designed for face forgery detection, but is extended here to detect AI-generated faces.

**LNP** [31] extracts noise patterns using a pretrained denoising network, and fits a one-class support vector machine [A3] to detect AI-generated faces as anomalies.

**LGrad** [47] feeds gradient maps from a pretrained network as input to a detector to capture generative artifacts.

**DIRE** [53] assumes that diffusion models reconstruct synthetic images more accurately. Detection is based on reconstruction errors as input to a ResNet-50.

| EXIF tag            | Example value                                      | #Unique entries | Count   |
|---------------------|----------------------------------------------------|-----------------|---------|
| Aperture            | F2.8, F4, F5.6, F3.5                               | 152             | 198,448 |
| Exposure Mode       | Auto, Auto-bracketing, Program, Manual             | 7               | 194,666 |
| Exposure Program    | Manual Control, Normal Program, Portrait Mode      | 6               | 176,787 |
| Exposure Time       | 1/60 sec, 1/125 sec, 1/250 sec                     | 1,745           | 198,488 |
| Focal Length        | 18.0 mm, 50.0 mm, 6.3 mm                           | 858             | 198,488 |
| ISO Speed           | 100, 200, 400, 800                                 | 269             | 198,488 |
| Makes               | Canon, Apple, Sony, Nikon                          | 10              | 198,247 |
| Metering Mode       | Center-weighted, Average, Partial, Spot            | 8               | 196,340 |
| White Balance Mode  | Auto, Manual                                       | 2               | 193,279 |
| Custom Rendered     | Custom Process, Normal Process, Unknown            | 3               | 180,667 |
| Date/Time           | 2013:03:28 04:20:46                                | 96,568          | 196,639 |
| Date/Time Digitized | 2013:03:28 04:20:46                                | 96,447          | 197,521 |
| Date/Time Original  | 2013:03:28 04:20:46                                | 96,827          | 198,227 |
| EXIF Version        | 2.21, 2.20, 2.30                                   | 11              | 197,673 |
| Flash               | Unfired, Fired, Unknown, Fired Auto                | 4               | 198,317 |
| F-Number            | F2.8, F4, F5.6, F3.5                               | 111             | 197,501 |
| Resolution Unit     | Inch, Cm, No Unit, Unknown                         | 4               | 193,347 |
| Scene Capture Type  | Standard, Portrait, Nightscene, Landscape, Unknown | 5               | 192,638 |
| Shutter Speed       | 1/60 sec, 1/125 sec, 1/250 sec                     | 1,195           | 196,970 |
| X Resolution        | 72 dots per inch                                   | 107             | 193,173 |
| Y Resolution        | 72 dots per inch                                   | 108             | 193,173 |

Table 8. Overview of EXIF tags appearing in more than 50% of the collected photographic face images. The upper section lists the nine tags retained for pretraining based on relevance, informativeness, and non-redundancy.

**Ojha23** [38] employs CLIP’s frozen visual encoder to extract features for binary classification of photographic vs. AI-generated images.

**AEROBLADE** [43] is a training-free approach that calculates LPIPS [A4] reconstruction errors of latent diffusion autoencoders, leveraging the similar observation that synthetic images are reconstructed more faithfully.

**FatFormer** [32] fine-tunes CLIP with a forgery-aware Transformer adapter, integrating spatial and frequency cues.

**Zou25** [66] casts ordinal EXIF-tag ranking as a pretext task, and employs one-class anomaly detection for inference.

**CLIP** [41] is a vision-language model pretrained on large-scale image-text pairs. Its general-purpose features can be adapted for identifying AI-generated content.

**FaRL** [62] jointly learns signal-level and semantic-level face representations from photographic images via contrastive and masked modeling. Due to its transferable features, we tailor it for detecting AI-generated faces.

**EAL** [61] aligns EXIF metadata (as text prompts) with images, aiming to learn imaging-specific representations.

**Hu21** [22] detects GAN-generated faces by analyzing inconsistencies in corneal specular highlights, which are typically stable in human eyes but erratic in synthetic imagery.

## D. Visual Samples

To illustrate the diversity and practical relevance of our evaluation setups, we provide representative face images used during training and testing.

- **Training Set:** Fig. 5(a) displays face photographs drawn from the CelebA-HQ dataset [25].
- **Cross-Generator Evaluation:** Figs. 5(b)-(j) show synthetic face images generated by nine representative models: StyleGAN2 [27], VQGAN [13], LDM [44], DDIM [46], SDv2.1 [44], FreeDoM [58], HPS [55], Mid-journey [1], and SDXL [39].
- **Cross-Dataset Evaluation:** Fig. 6 presents additional samples for domain transfer experiments. Specifically, the evaluation involves testing on FFHQ photographs and synthetic images generated by StyleGAN2, VQGAN, and LDM trained on FFHQ [26]. This setup assesses the robustness of the learned representations to variations in data distribution and image source.

These samples qualitatively demonstrate the visual similarity between photographic and AI-generated faces, highlighting the challenges of reliable detection and the necessity of learning discriminative, generalizable features.

## References

- [A1] Chelsea Finn, Pieter Abbeel, and Sergey Levine. Model-agnostic meta-learning for fast adaptation of deep networks. in *ICML*, pages 1126–1135, 2017. 1
- [A2] Hanxiao Liu, Karen Simonyan, and Yiming Yang. DARTS: Differentiable architecture search. *arXiv preprint arXiv:1806.09055*, 2018. 1
- [A3] Bernhard Schölkopf, Robert C. Williamson, Alex Smola, John Shawe-Taylor, and John Platt. Support

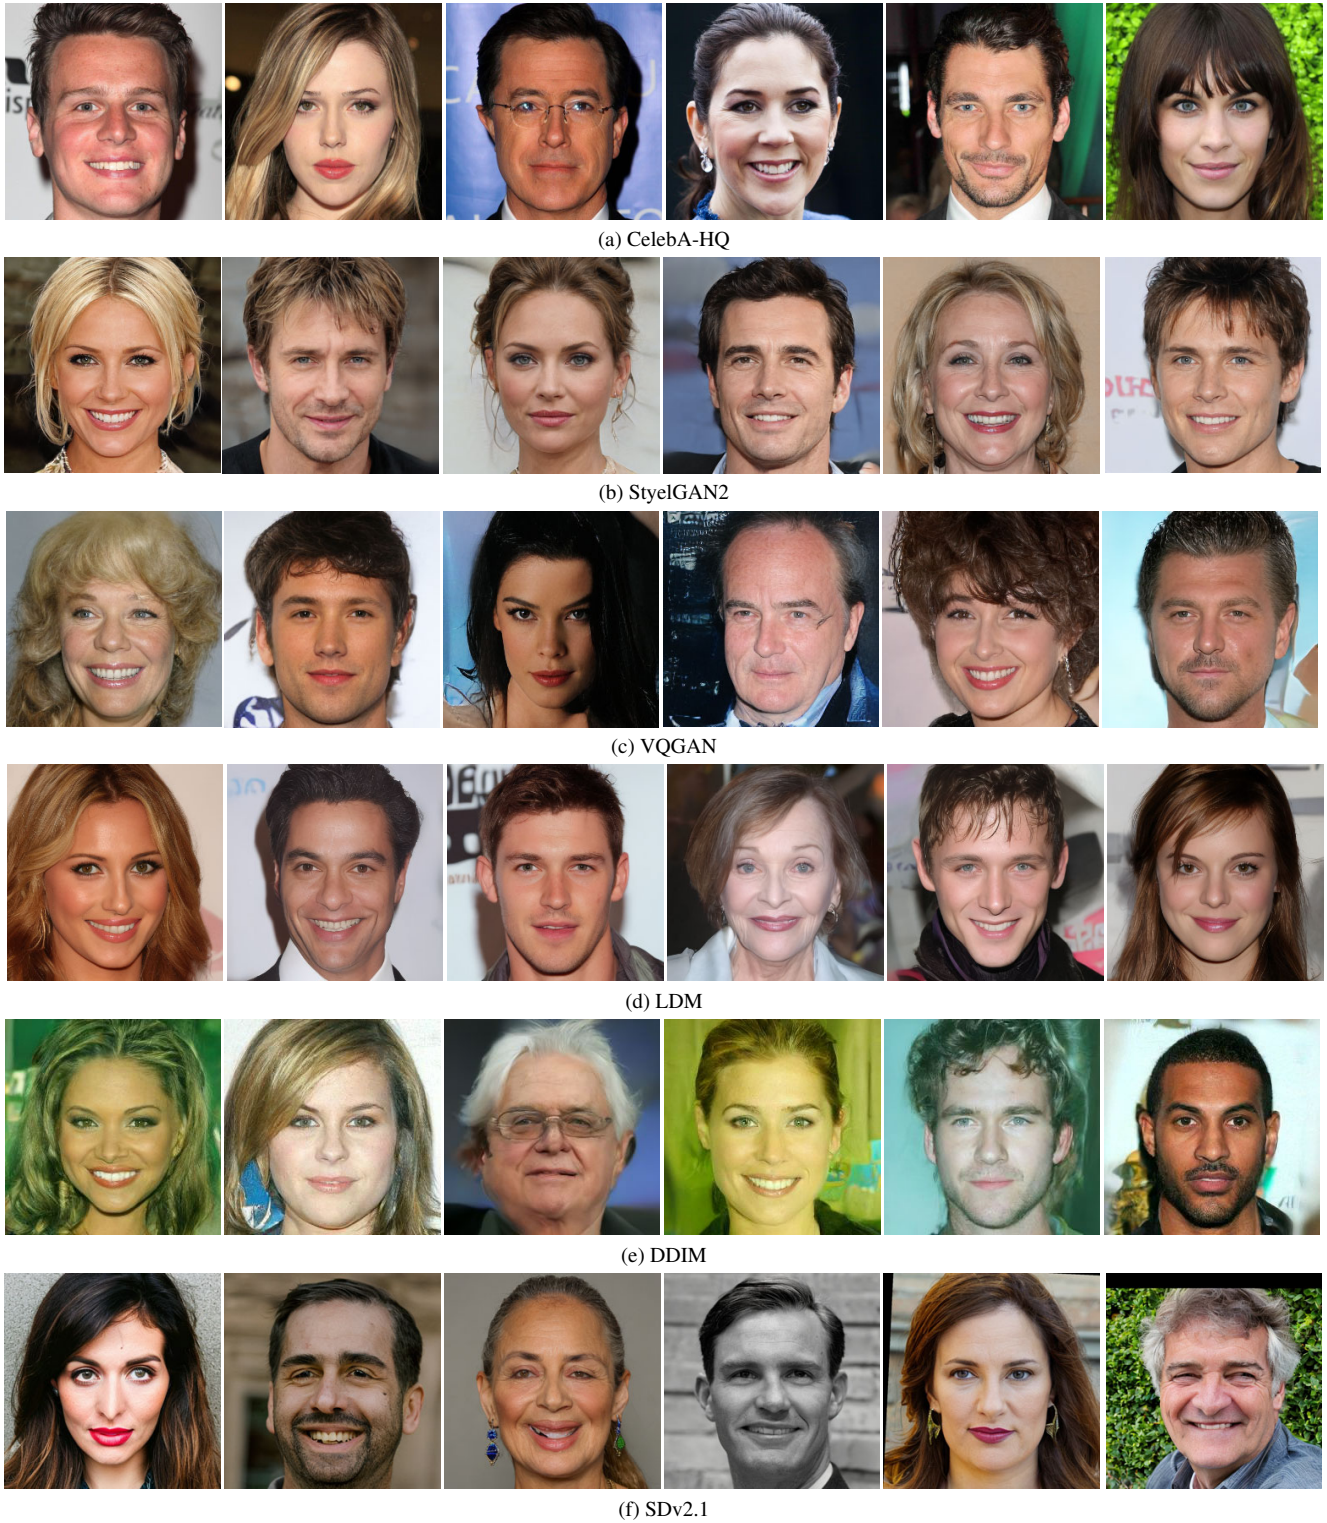

Figure 5. Representative face images used in cross-generator evaluation. (Part 1 of 2).

vector method for novelty detection. In *NeurIPS*, pages 582–588, 1999. [1](#)

[A4] Richard Zhang, Phillip Isola, Alexei A. Efros, Eli Shechtman, and Oliver Wang. The unreasonable ef-



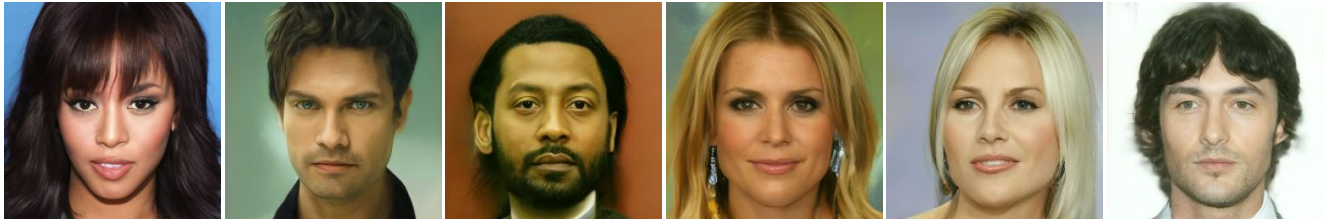

(g) FreeDoM

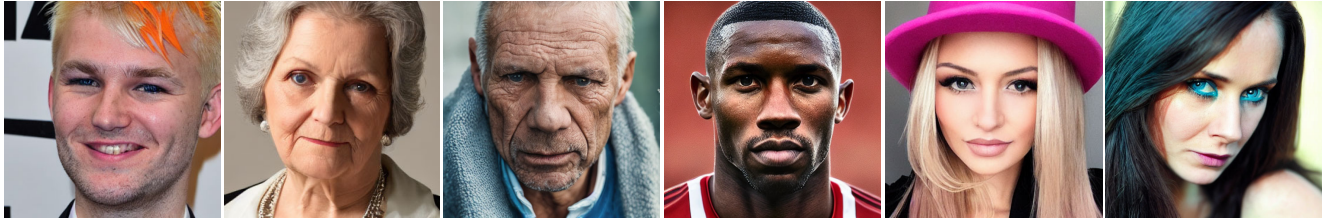

(h) HPS

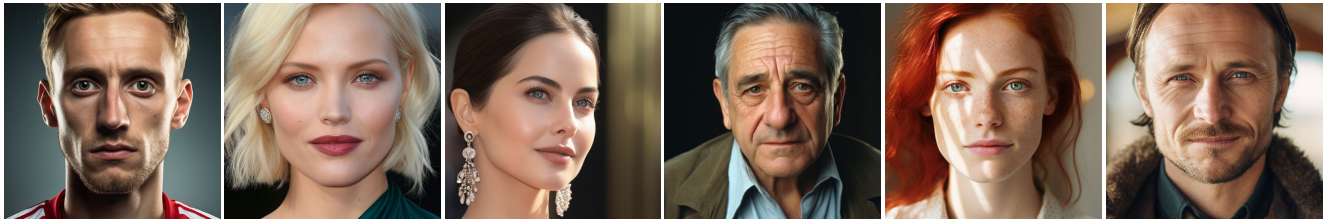

(i) Midjourney

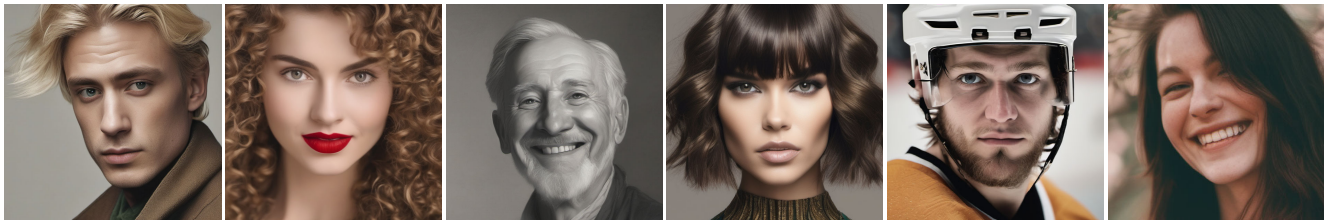

(j) SDXL

Figure 5. Representative face images used in cross-generator evaluation. (Part 2 of 2).

fectiveness of deep features as a perceptual metric. In *CVPR*, pages 586–595, 2018. [2](#)

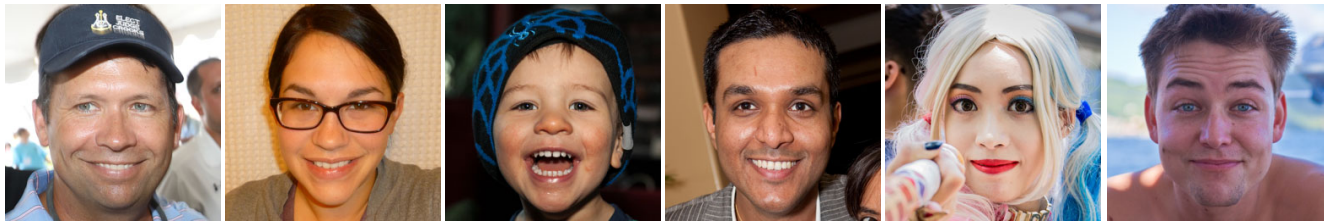

(a) FFHQ

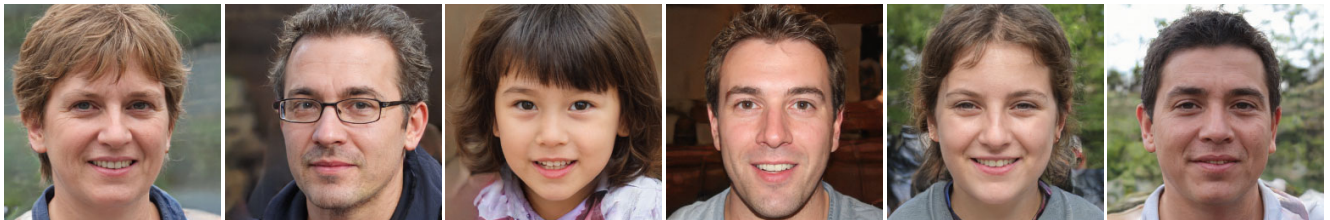

(b) StyleGAN2

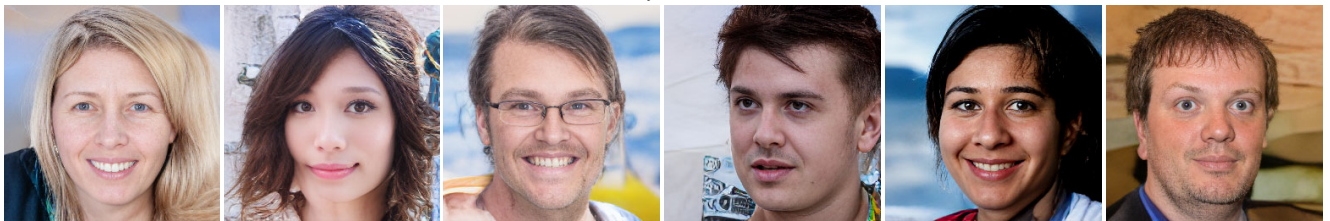

(c) VQGAN

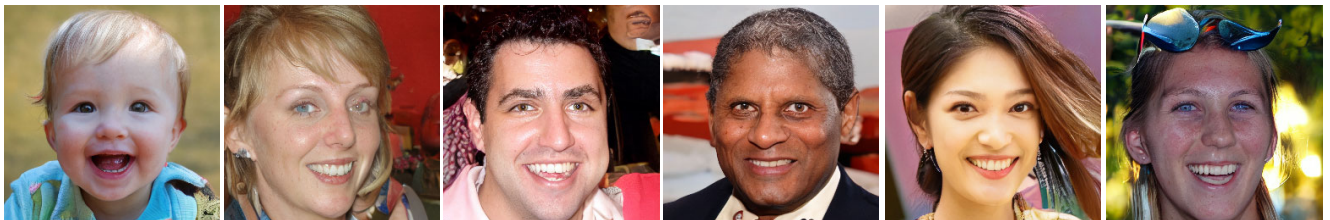

(d) LDM

Figure 6. Representative face images used in cross-dataset evaluation.
